# Supplementary material for: Exploring Factors Affecting Urban Park Use from a Geospatial Perspective: A Big Data Study in Fuzhou, China
Source: MDPI journal article supplement (doi:10.3390/ijerph20054237), 2023-02-27
Supplement: s1 [file s1]

**Exploring factors affecting urban park use from a geospatial perspective: A big data study in Fuzhou, China**

**Supplementary Figures**

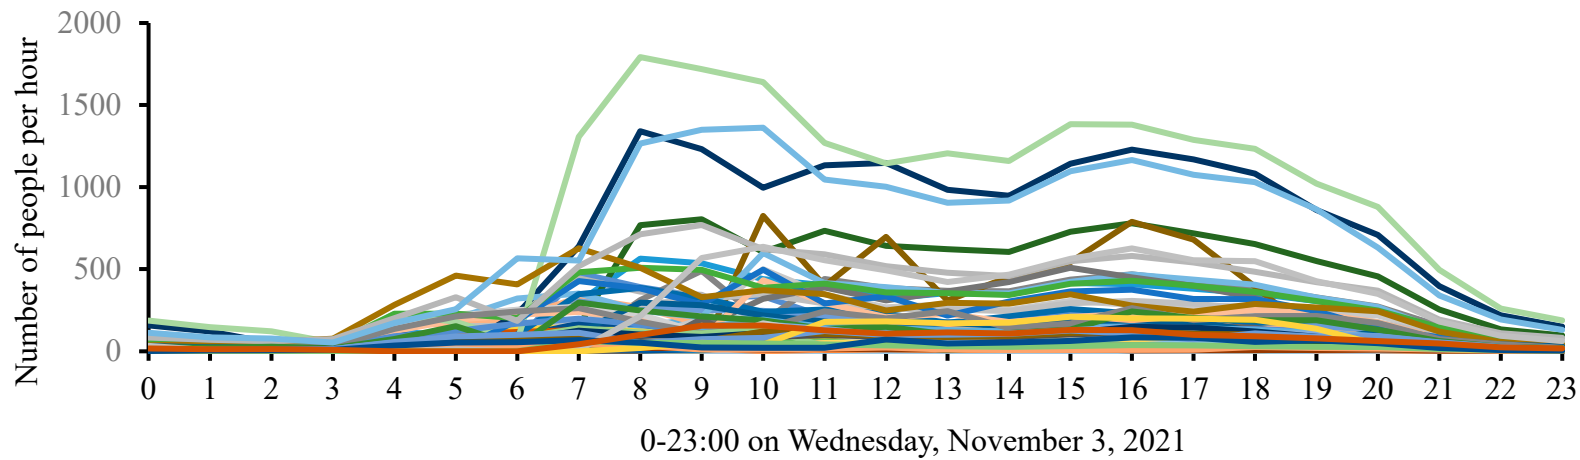

- |                        |                                    |                           |                           |
|------------------------|------------------------------------|---------------------------|---------------------------|
| Fuzhou square park     | Sanjiehe square park               | Yafeng park               | Douding sponge park       |
| Jin 'anhu park         | Guangming disaster prevention park | Jin 'an Jiangbin park     | Guangminggang south park  |
| Taijiang sports park   | Yafeng beading park                | Party building theme park | Fukshan country park      |
| Qintinghu park         | Liminghu park                      | Liuhuaxi park             | Linpu park                |
| Lianjiang park         | Tianze sports park                 | Taiyuhe park              | Shita park                |
| Minjiang park          | Yangxia park                       | Jinniushan sports park    | Aixiang park              |
| Jin 'anhe park         | Jinjiang park                      | Minshui park              | Qiulong park              |
| Jingang park           | Nanjiangbin park                   | Fudao park                | Wuyi square park          |
| Jinniushan park        | Fuzhou national forest park        | Fuzhou children's park    | Jingdianhu park           |
| Helin park             | Wangzhuang park                    | Yushan scenic park        | Wenlinshan park           |
| Wushan historical park | Guanglufang park                   | Rongcheng square park     | Aotan park                |
| Fuzhou zoo park        | Chiqiao park                       | Zuohai park               | Yijing park               |
| Victoria park          | Pingshan park                      | Wenquan park              | Wufeng park               |
| Meifeng park           | Jinjiashan park                    | Xihu park                 | Hubian park               |
| Luohanshan sports park | Huannan park                       | Yesan park                | Niugangshan park          |
| Gulouqian park         | Chenxi square park                 | Jiantianhu park           | Jinshan park              |
| Shatan park            | Worker's park                      | Xichan temple park        | Xihe park                 |
| Feifengshan theme park | Guoguang park                      | Chating park              | Nan park                  |
| Tongshou park          | Baimahe park                       | Guangminggang park        | Datiegang park            |
| Hutou park             | Wanglong park                      | Binfen park               | Fuzhou panda world park   |
| Chang 'anshan park     | Yantaishan park                    | Cangqian park             | Jiangxin park             |
| Cangxia park           | Cangshan education park            | Taijiang jiangbin park    | Fenglingmu park           |
| Huaqiao park           | Hexie park                         | Shuishang park            | Wuyi sports park          |
| Huahai park            | Sanjiangkou ecological park        | Gaogaishan park           | South station square park |
| Jinsha park            | South riverside park               |                           |                           |

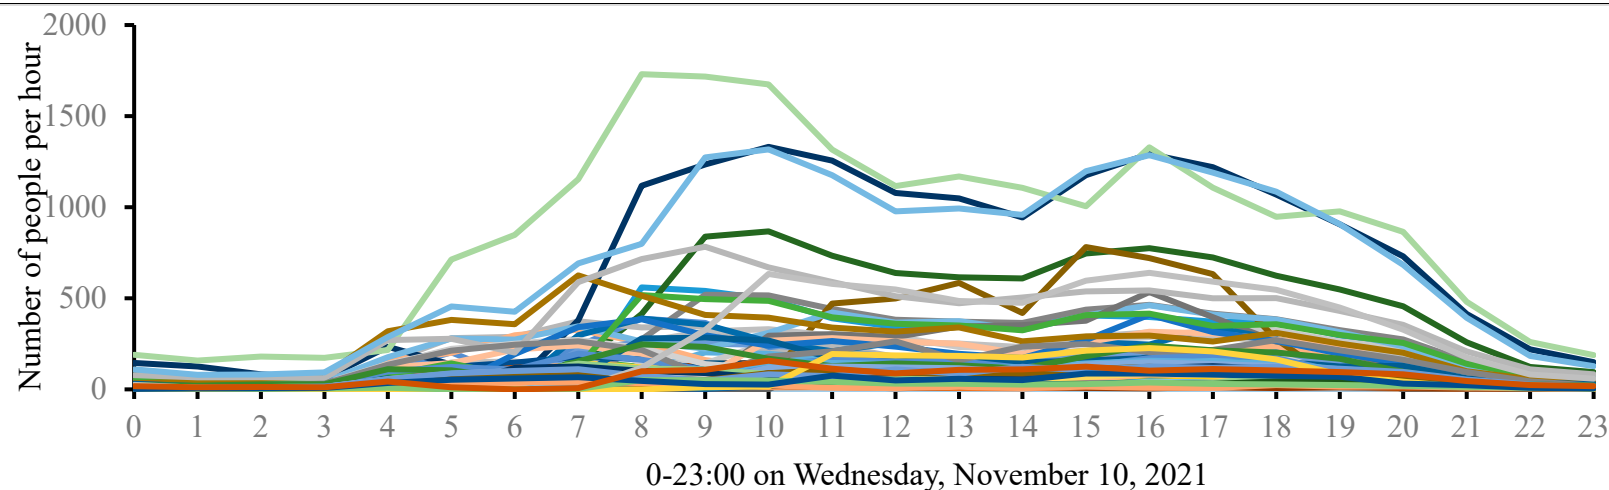

- |                        |                                    |                           |                           |
|------------------------|------------------------------------|---------------------------|---------------------------|
| Fuzhou square park     | Sanjiede square park               | Yafeng park               | Douding sponge park       |
| Jin 'anhu park         | Guangming disaster prevention park | Jin 'an Jiangbin park     | Guangminggang south park  |
| Taijiang sports park   | Yafeng beading park                | Party building theme park | Fukshan country park      |
| Qintinghu park         | Liminghu park                      | Liuhuaxi park             | Linpu park                |
| Lianjiang park         | Tianze sports park                 | Taiyuhe park              | Shita park                |
| Minjiang park          | Yangxia park                       | Jinniushan sports park    | Aixiang park              |
| Jin 'anhe park         | Jinjiang park                      | Minshui park              | Qiulong park              |
| Jingang park           | Nanjiangbin park                   | Fudao park                | Wuyi square park          |
| Jinniushan park        | Fuzhou national forest park        | Fuzhou children's park    | Jingdianhu park           |
| Helin park             | Wangzhuang park                    | Yushan scenic park        | Wenlinshan park           |
| Wushan historical park | Guanglufang park                   | Rongcheng square park     | Aotan park                |
| Fuzhou zoo park        | Chiqiao park                       | Zuohai park               | Yijing park               |
| Victoria park          | Pingshan park                      | Wenquan park              | Wufeng park               |
| Meifeng park           | Jinjishan park                     | Xihu park                 | Hubian park               |
| Luohanshan sports park | Huannan park                       | Yeshan park               | Niugangshan park          |
| Gulouqian park         | Chenxi square park                 | Jiantianhu park           | Jinshan park              |
| Shatan park            | Worker's park                      | Xichan temple park        | Xihe park                 |
| Feifengshan theme park | Guoguang park                      | Chating park              | Nan park                  |
| Tongshou park          | Baimahe park                       | Guangminggang park        | Datiegang park            |
| Hutou park             | Wanglong park                      | Binfen park               | Fuzhou panda world park   |
| Chang 'anshan park     | Yantaishan park                    | Cangqian park             | Jiangxin park             |
| Cangxia park           | Cangshan education park            | Taijiang jiangbin park    | Fenglingmu park           |
| Huaqiao park           | Hexie park                         | Shuishang park            | Wuyi sports park          |
| Huahai park            | Sanjiangkou ecological park        | Gaogaishan park           | South station square park |
| Jinsha park            | South riverside park               |                           |                           |

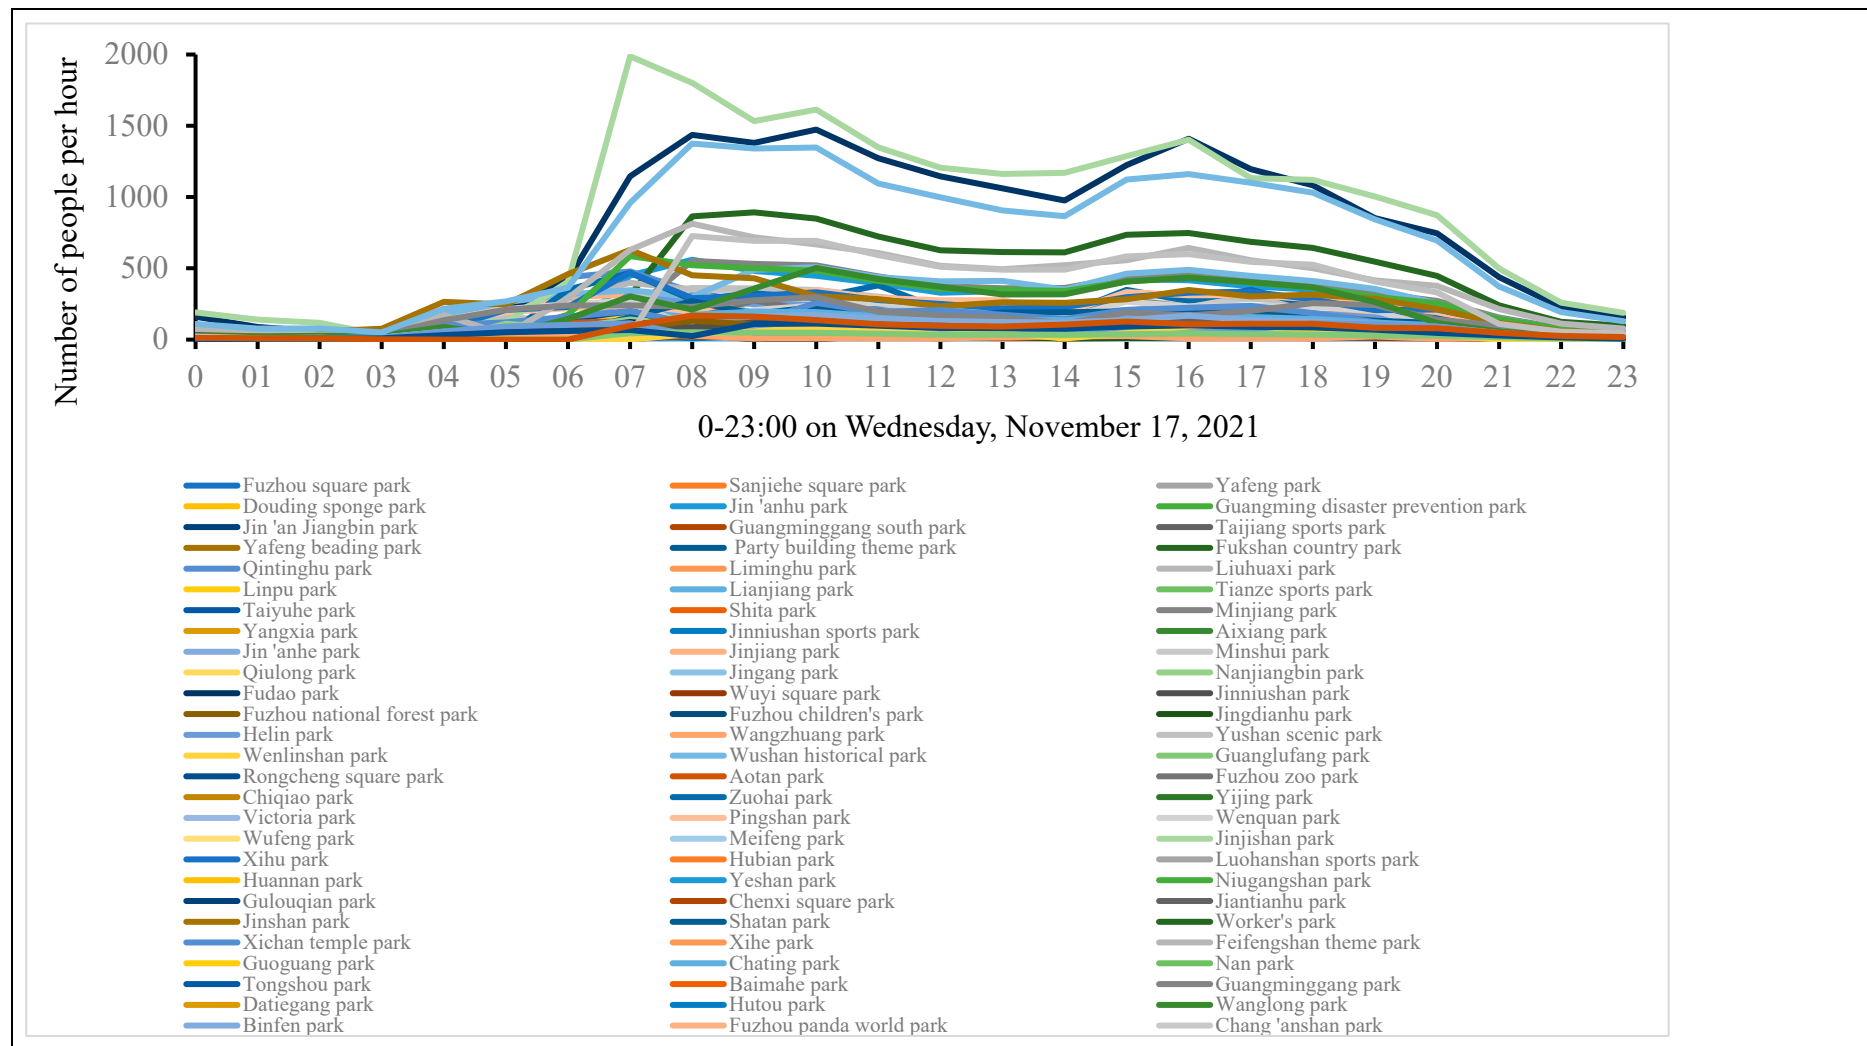

Figure S1 Hourly RTUD data on three consecutive Wednesdays of parks in the study area

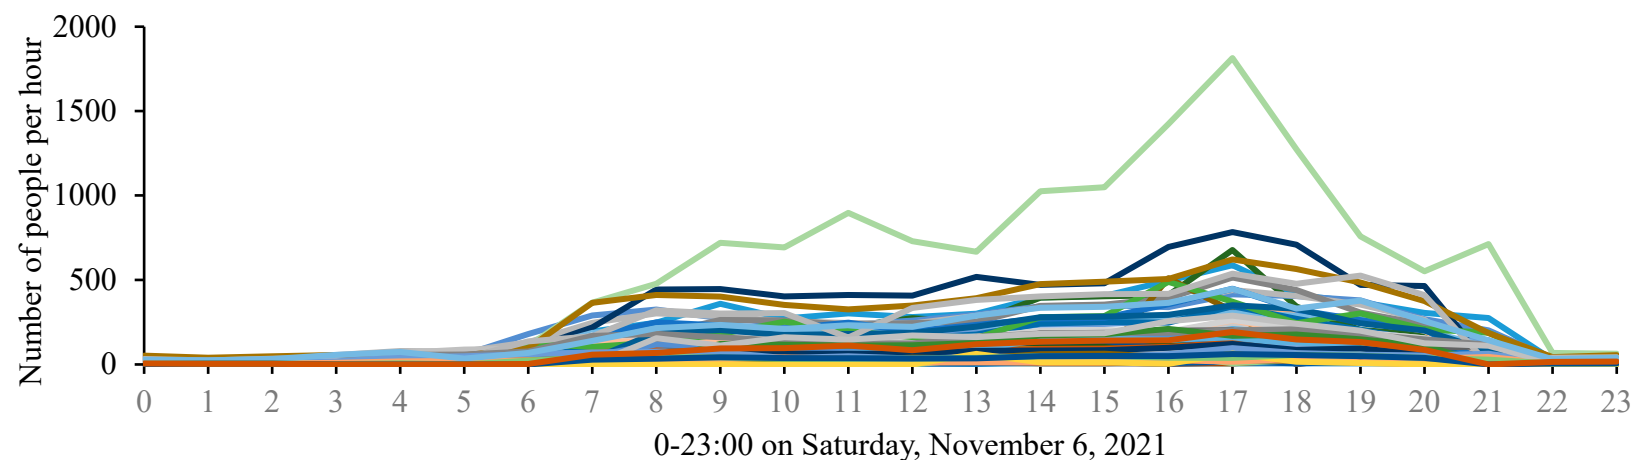

- |                        |                                    |                           |                           |
|------------------------|------------------------------------|---------------------------|---------------------------|
| Fuzhou square park     | Sanjiehe square park               | Yafeng park               | Douding sponge park       |
| Jin 'anhu park         | Guangming disaster prevention park | Jin 'an Jiangbin park     | Guangminggang south park  |
| Taijiang sports park   | Yafeng beading park                | Party building theme park | Fukshan country park      |
| Qintinghu park         | Liminghu park                      | Liuhuaxi park             | Linpu park                |
| Lianjiang park         | Tianze sports park                 | Taiyuhe park              | Shita park                |
| Minjiang park          | Yangxia park                       | Jinniushan sports park    | Aixiang park              |
| Jin 'anhe park         | Jinjiang park                      | Minshui park              | Qiulong park              |
| Jingang park           | Nanjiangbin park                   | Fudao park                | Wuyi square park          |
| Jinniushan park        | Fuzhou national forest park        | Fuzhou children's park    | Jingdianhu park           |
| Helin park             | Wangzhuang park                    | Yushan scenic park        | Wenlinshan park           |
| Wushan historical park | Guanglufang park                   | Rongcheng square park     | Aotan park                |
| Fuzhou zoo park        | Chiqiao park                       | Zuohai park               | Yijing park               |
| Victoria park          | Pingshan park                      | Wenquan park              | Wufeng park               |
| Meifeng park           | Jinjishan park                     | Xihu park                 | Hubian park               |
| Luohanshan sports park | Huannan park                       | Yesan park                | Niugangshan park          |
| Gulouqian park         | Chenxi square park                 | Jiantianhu park           | Jinshan park              |
| Shatan park            | Worker's park                      | Xichan temple park        | Xihe park                 |
| Feifengshan theme park | Guoguang park                      | Chating park              | Nan park                  |
| Tongshou park          | Baimahe park                       | Guangminggang park        | Datiegang park            |
| Hutou park             | Wanglong park                      | Binfen park               | Fuzhou panda world park   |
| Chang 'anshan park     | Yantaishan park                    | Cangqian park             | Jiangxin park             |
| Cangxia park           | Cangshan education park            | Taijiang jiangbin park    | Fenglingmu park           |
| Huaqiao park           | Hexie park                         | Shuishang park            | Wuyi sports park          |
| Huahai park            | Sanjiangkou ecological park        | Gaogaishan park           | South station square park |
| Jinsha park            | South riverside park               |                           |                           |

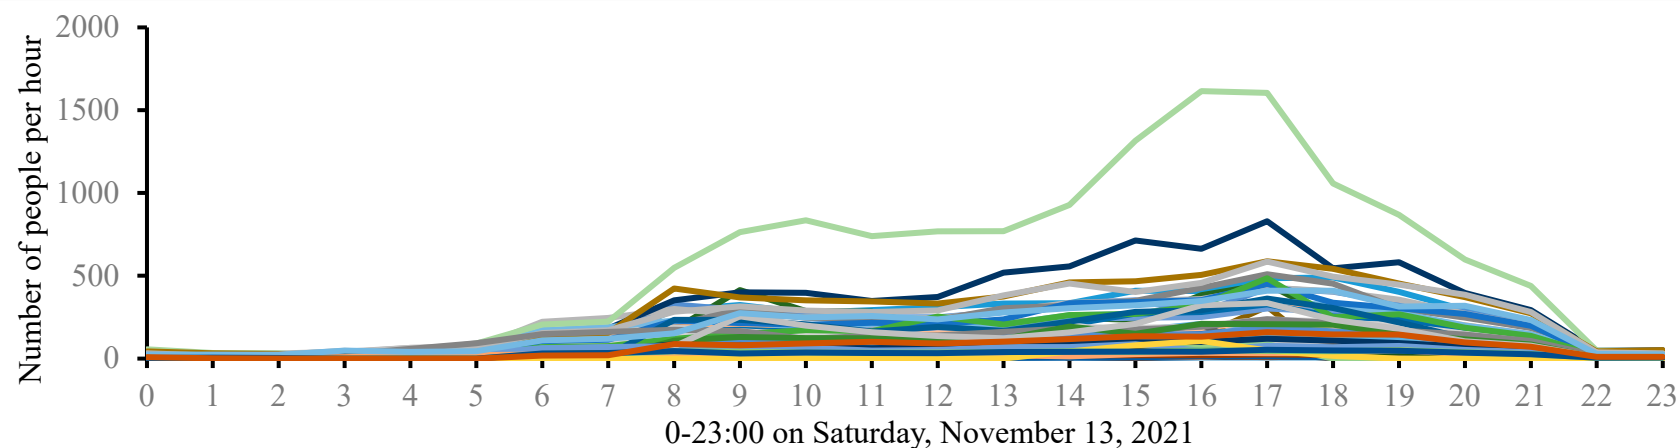

- |                        |                                    |                           |                           |
|------------------------|------------------------------------|---------------------------|---------------------------|
| Fuzhou square park     | Sanjiede square park               | Yafeng park               | Douding sponge park       |
| Jin 'anhu park         | Guangming disaster prevention park | Jin 'an Jiangbin park     | Guangminggang south park  |
| Taijiang sports park   | Yafeng beading park                | Party building theme park | Fukshan country park      |
| Qintinghu park         | Liminghu park                      | Liuhuaxi park             | Linpu park                |
| Lianjiang park         | Tianze sports park                 | Taiyuhe park              | Shita park                |
| Minjiang park          | Yangxia park                       | Jinniushan sports park    | Aixiang park              |
| Jin 'anhe park         | Jinjiang park                      | Minshui park              | Qiulong park              |
| Jingang park           | Nanjiangbin park                   | Fudao park                | Wuyi square park          |
| Jinniushan park        | Fuzhou national forest park        | Fuzhou children's park    | Jingdianhu park           |
| Helin park             | Wangzhuang park                    | Yushan scenic park        | Wenlinshan park           |
| Wushan historical park | Guanglufang park                   | Rongcheng square park     | Aotan park                |
| Fuzhou zoo park        | Chiqiao park                       | Zuohai park               | Yijing park               |
| Victoria park          | Pingshan park                      | Wenquan park              | Wufeng park               |
| Meifeng park           | Jinjishan park                     | Xihu park                 | Hubian park               |
| Luohanshan sports park | Huannan park                       | Yeshan park               | Niugangshan park          |
| Gulouqian park         | Chenxi square park                 | Jiantianhu park           | Jinshan park              |
| Shatan park            | Worker's park                      | Xichan temple park        | Xihe park                 |
| Feifengshan theme park | Guoguang park                      | Chating park              | Nan park                  |
| Tongshou park          | Baimahe park                       | Guangminggang park        | Datiegang park            |
| Hutou park             | Wanglong park                      | Binfen park               | Fuzhou panda world park   |
| Chang 'anshan park     | Yantaishan park                    | Cangqian park             | Jiangxin park             |
| Cangxia park           | Cangshan education park            | Taijiang jiangbin park    | Fenglingmu park           |
| Huaqiao park           | Hexie park                         | Shuishang park            | Wuyi sports park          |
| Huahai park            | Sanjiangkou ecological park        | Gaogaishan park           | South station square park |
| Jinsha park            | South riverside park               |                           |                           |

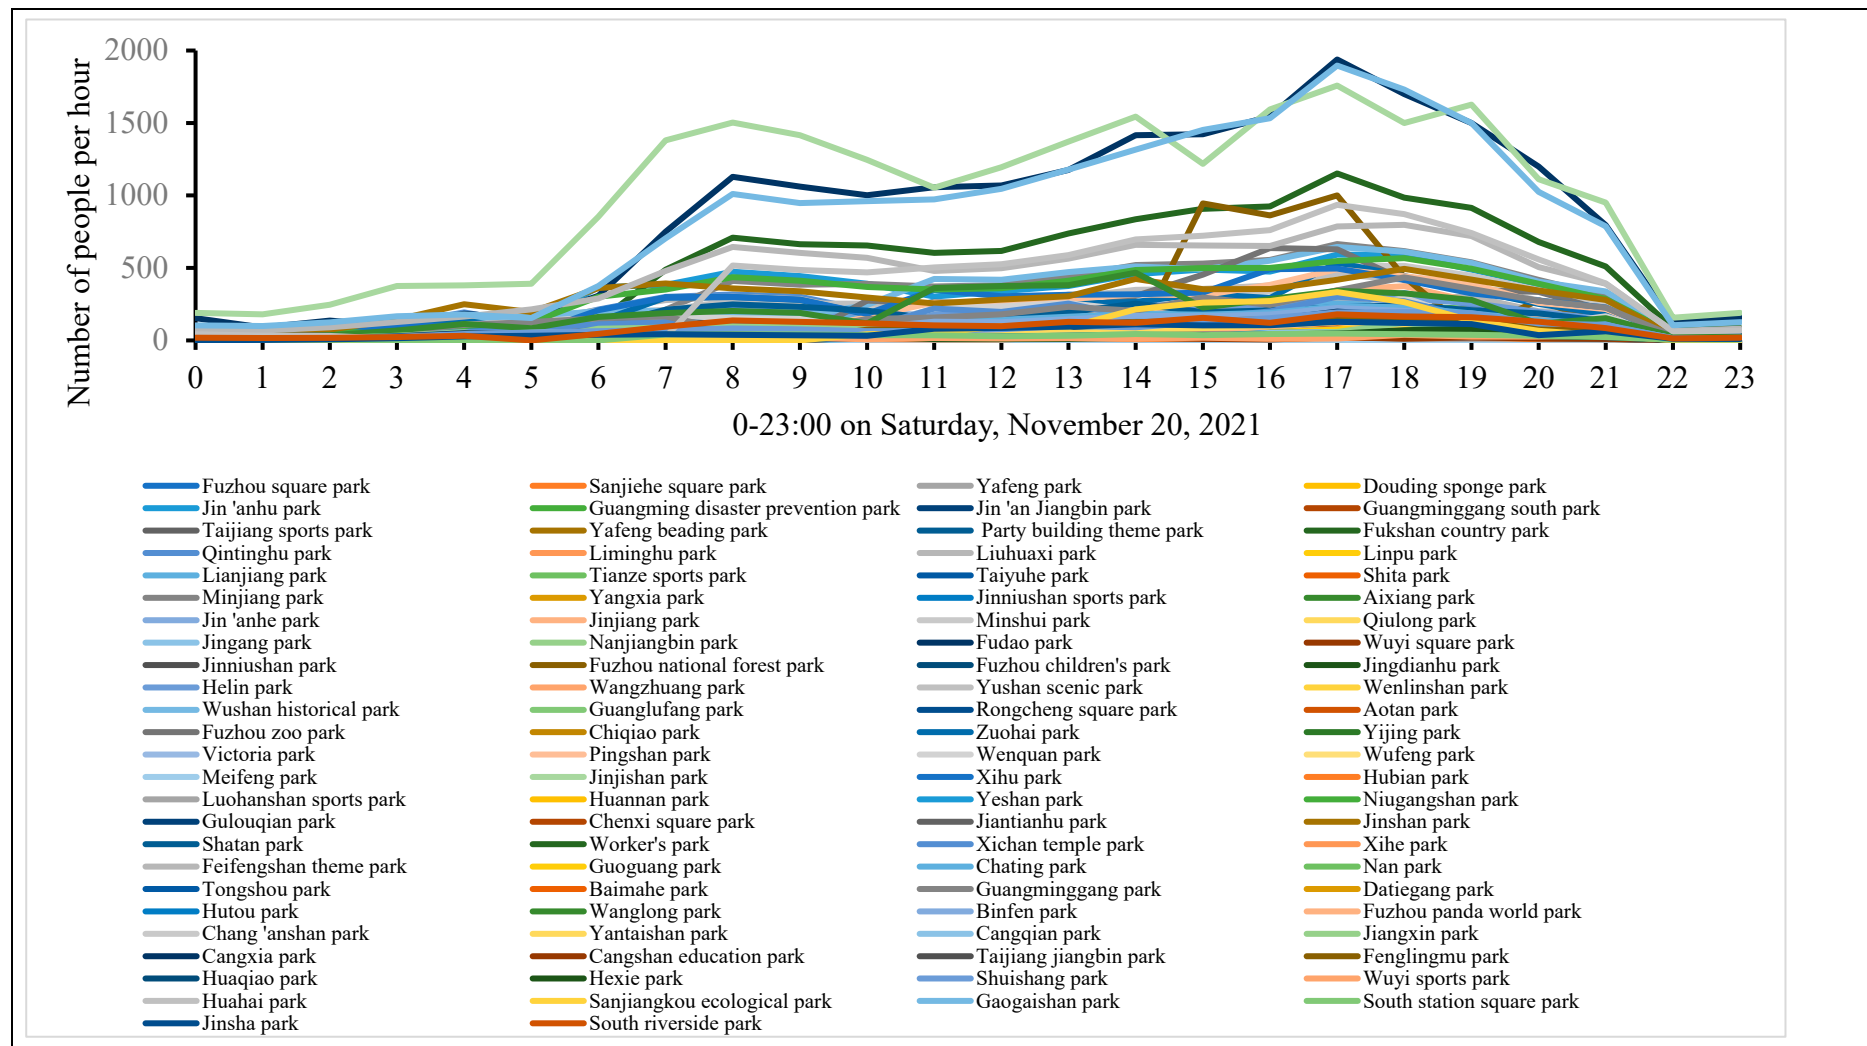

Figure S2 Hourly RTUD data on three consecutive Saturdays of parks in the study area

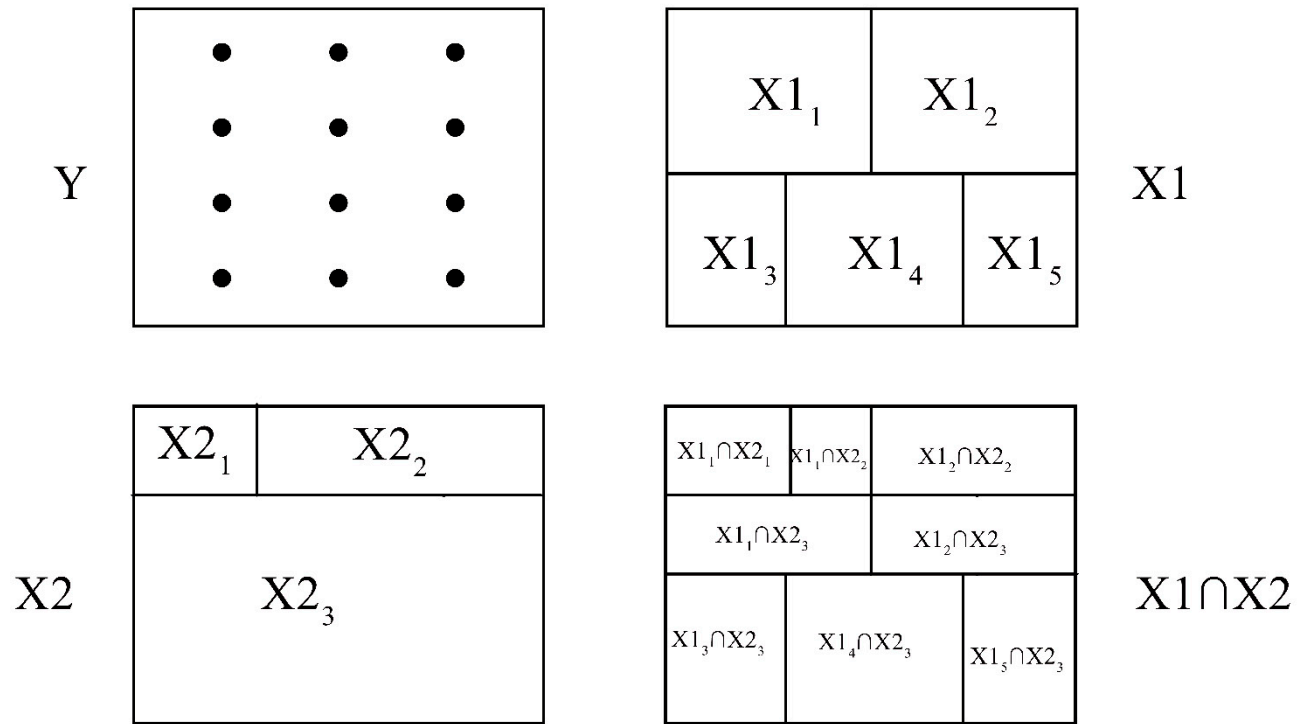

Figure S3 Interaction detection. Note:  $q(X)$  and  $q(X_1)$  are calculated respectively. Overlay the two layers  $X_1$  and  $X_2$  to get the new layer  $X1 \cap X2$ , calculate  $q(X1 \cap Y2)$ . Judge the interaction type of the two factors according to Table S2
