# Supplementary material for: Exploring Factors Affecting Urban Park Use from a Geospatial Perspective: A Big Data Study in Fuzhou, China
Source: MDPI journal article supplement (doi:10.3390/ijerph20054237), 2023-02-27
Supplement: s1 [file s1]

# Exploring factors affecting urban park use from a geospatial perspective: A big data study in Fuzhou, China

## Supplementary Tables

Table S1 Results of repeatable multivariate analysis of variance.

| differences between the source | SS       | df  | MS       | F        | P-value | F crit   |
|--------------------------------|----------|-----|----------|----------|---------|----------|
| between parks                  | 353197.5 | 1   | 353197.5 | 1804.469 | 0       | 3.86529  |
| between weekdays and weekends  | 1418774  | 97  | 14626.54 | 74.72628 | 0       | 1.287376 |
| interaction                    | 370361.8 | 97  | 3818.163 | 19.50681 | 0       | 1.287376 |
| interior                       | 76728.06 | 392 | 195.7348 |          |         |          |
| total                          | 2219061  | 587 |          |          |         |          |

Table S2 The interactive types of two factors and the interactive relationship.

| Description                                                     | Interaction         |
|-----------------------------------------------------------------|---------------------|
| $q(x_1 \cap x_2) < \min(q(x_1), q(x_2))$                        | Weakened, nonlinear |
| $\min(q(x_1), q(x_2)) < q(x_1 \cap x_2) < \max(q(x_1), q(x_2))$ | Weakened, unique    |
| $q(x_1 \cap x_2) > \max(q(x_1), q(x_2))$                        | Enhanced, bilinear  |
| $q(x_1 \cap x_2) = q(x_1) + q(x_2)$                             | Independent         |
| $q(x_1 \cap x_2) > q(x_1) + q(x_2)$                             | Enhanced, nonlinear |

Table S3 The variance inflation factors (VIFs) for each variable by OLS.

(A)weekday

| Variable | P-si  | P-ty  | Lsi   | W-si  | P-fa  | Psc   | Dtc   | Bsd   | W-15  | D-30  | Rpd   | Wpd   | Spoi  |
|----------|-------|-------|-------|-------|-------|-------|-------|-------|-------|-------|-------|-------|-------|
| VIF      | 1.667 | 1.880 | 1.208 | 1.583 | 1.227 | 1.649 | 2.583 | 1.734 | 2.070 | 1.337 | 3.466 | 3.101 | 4.517 |

(B)weekend

| Variable | P-si  | P-ty  | Lsi   | W-si  | P-fa  | Psc   | Dtc   | Bsd   | W-15  | D-30  | Rpd   | Wpd   | Spoi  |
|----------|-------|-------|-------|-------|-------|-------|-------|-------|-------|-------|-------|-------|-------|
| VIF      | 1.667 | 1.880 | 1.208 | 1.583 | 1.227 | 1.649 | 2.583 | 1.734 | 2.070 | 1.337 | 3.466 | 3.101 | 4.517 |

Table S4 Model fit metrics for ordinary least squares (OLS) regression, geographically weighted regression (GWR), and multiscale geographically weighted regression(MGWR).

| park use | Fit metrics | Model    |          |         |
|----------|-------------|----------|----------|---------|
|          |             | OLS      | GWR      | MGWR    |
| weekday  | R2(adjust)  | 0.640755 | 0.618797 | 0.664   |
|          | AICc        | 820.287  | 829.944  | 206.367 |
| weekend  | R2(adjust)  | 0.603265 | 0.577156 | 0.65    |
|          | AICc        | 843.8697 | 854.3444 | 210.292 |
